# Supplementary material
Source: PubMed Central journal article supplement (PMC1864881)

Said et al., Supplement Figure 1:

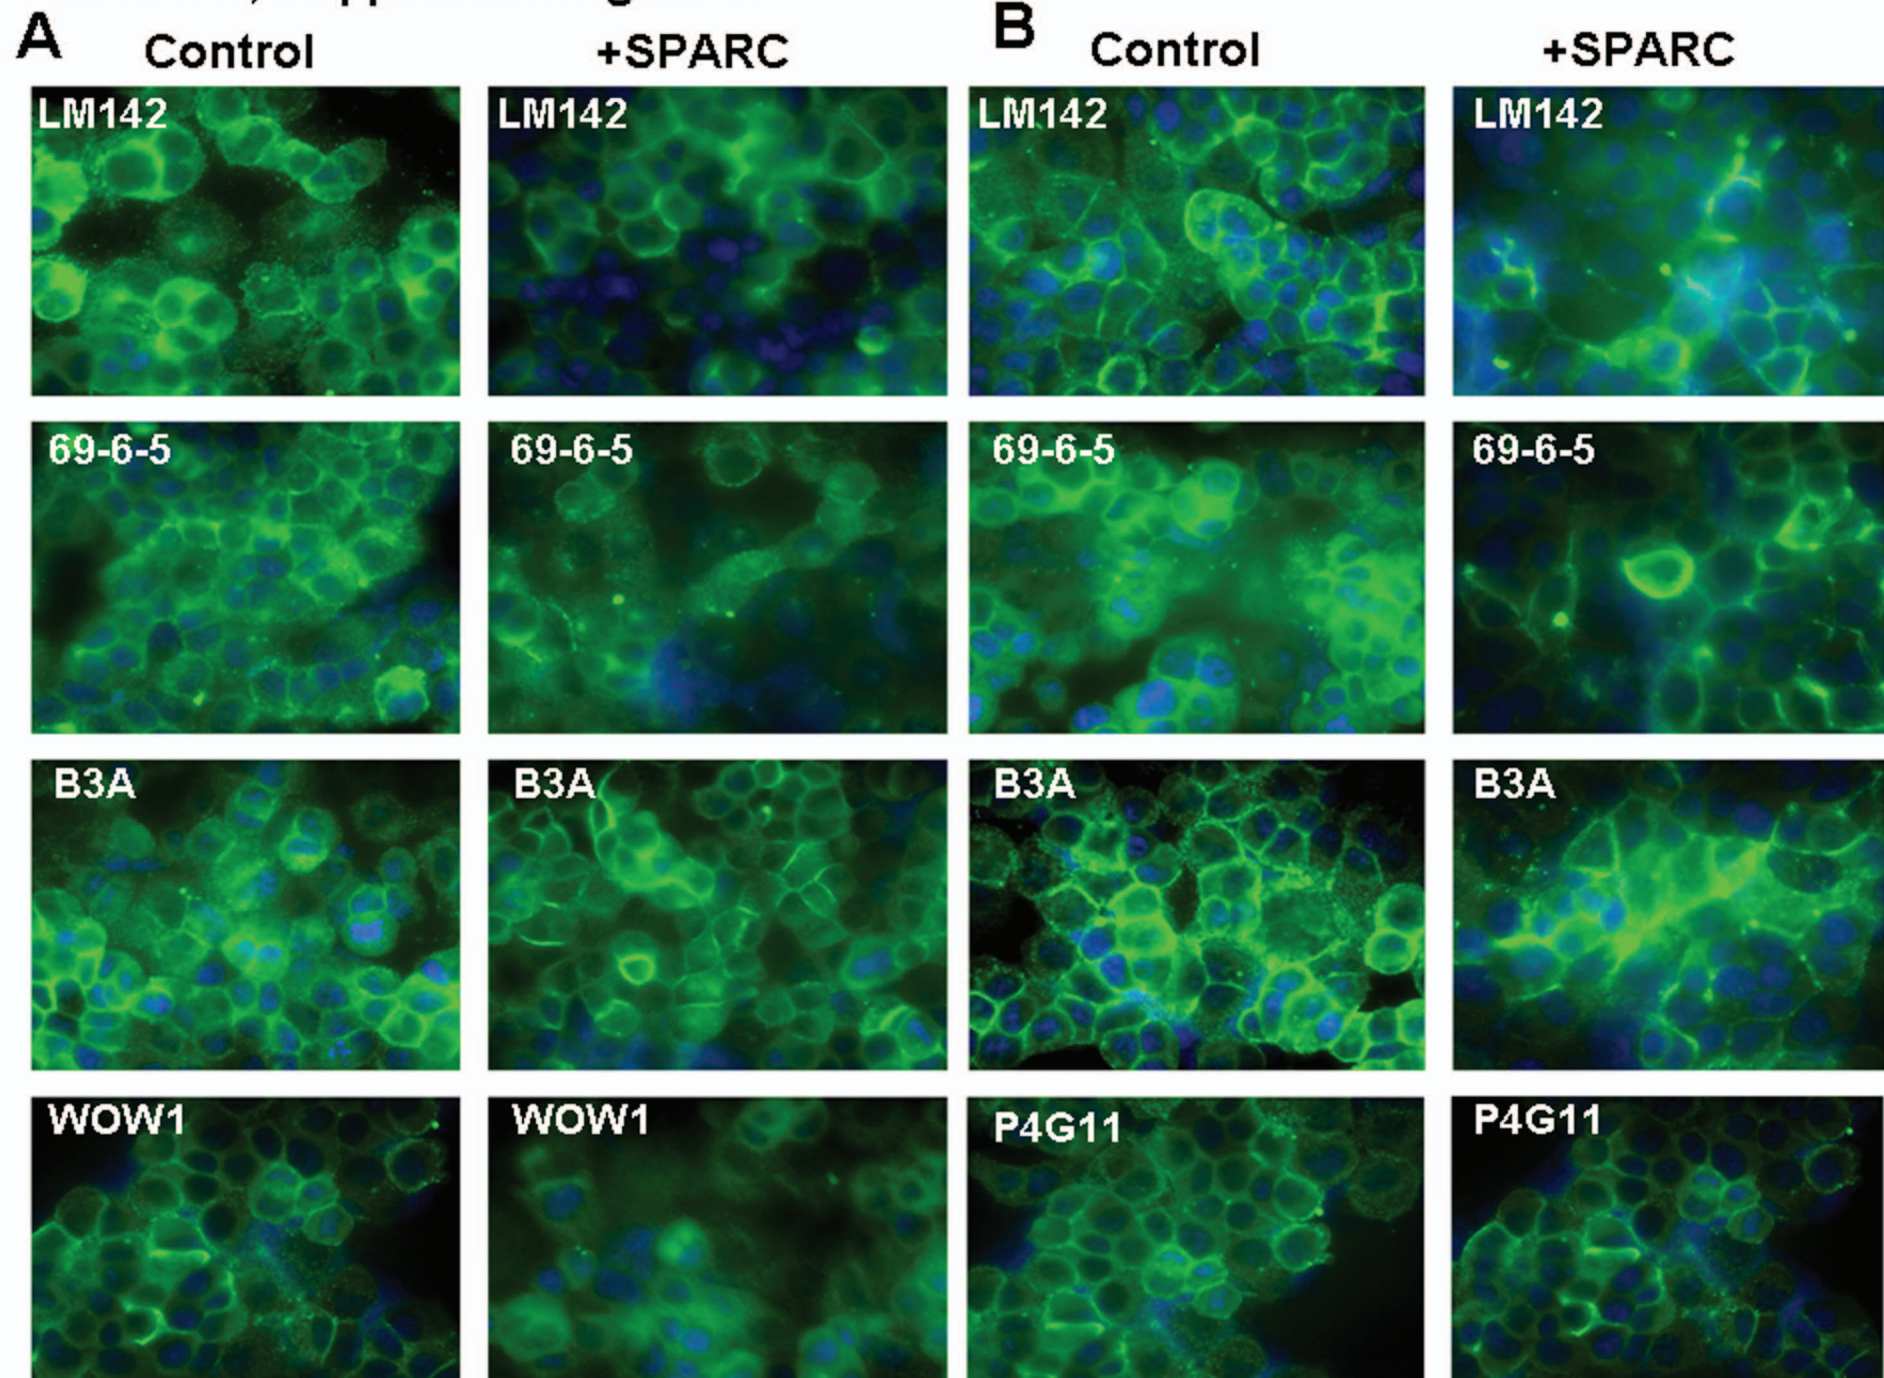

Supplement: amjpathol_170_3_1054__1.pdf [file amjpathol_170_3_1054__1.pdf]

Said et al., Supplement Figure 2:

Control

+SPARC

SKOV3

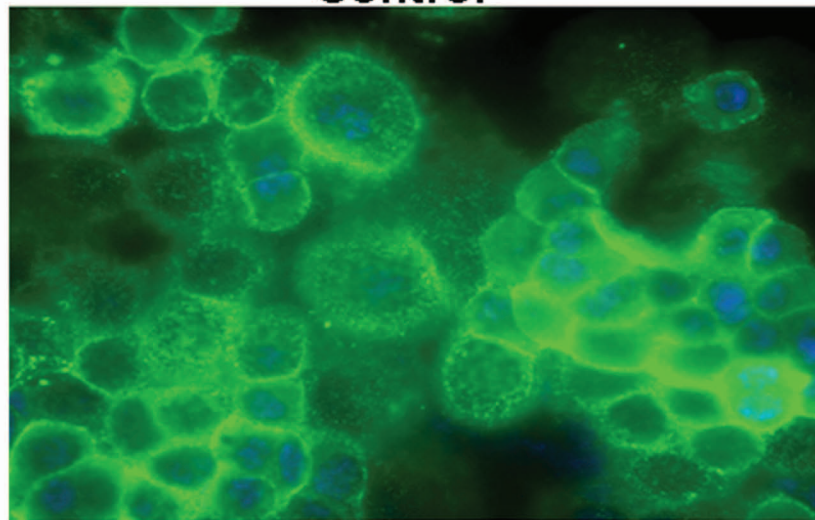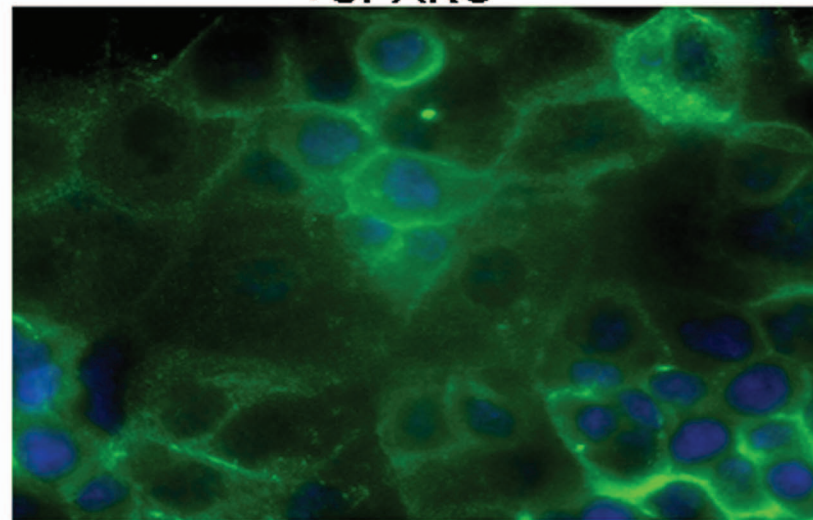

OVCAR3

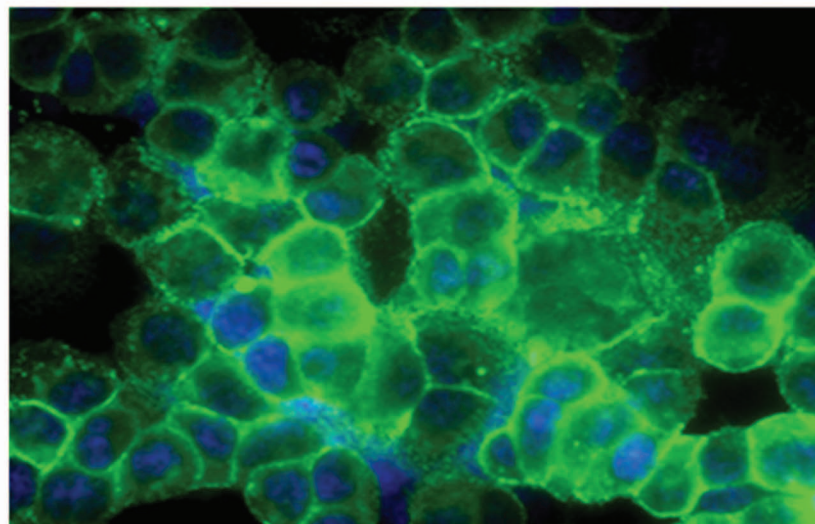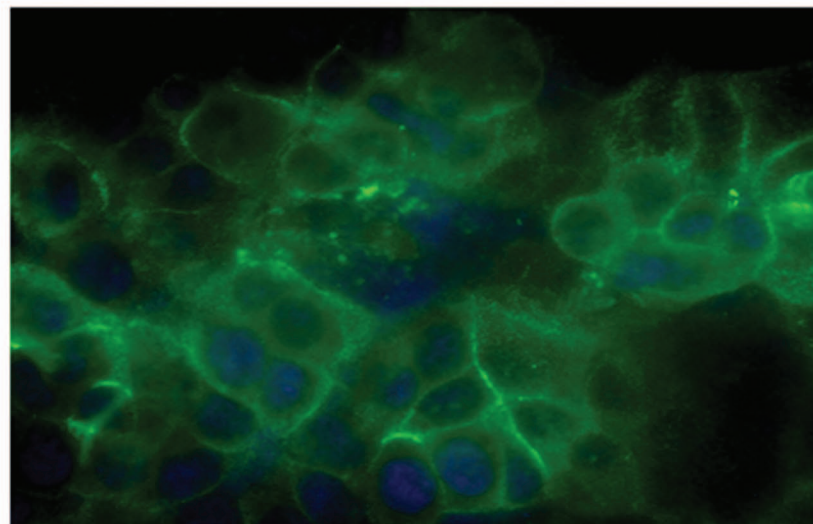

Supplement: amjpathol_170_3_1054__2.pdf [file amjpathol_170_3_1054__2.pdf]

Said et al., Supplement Figure 3:

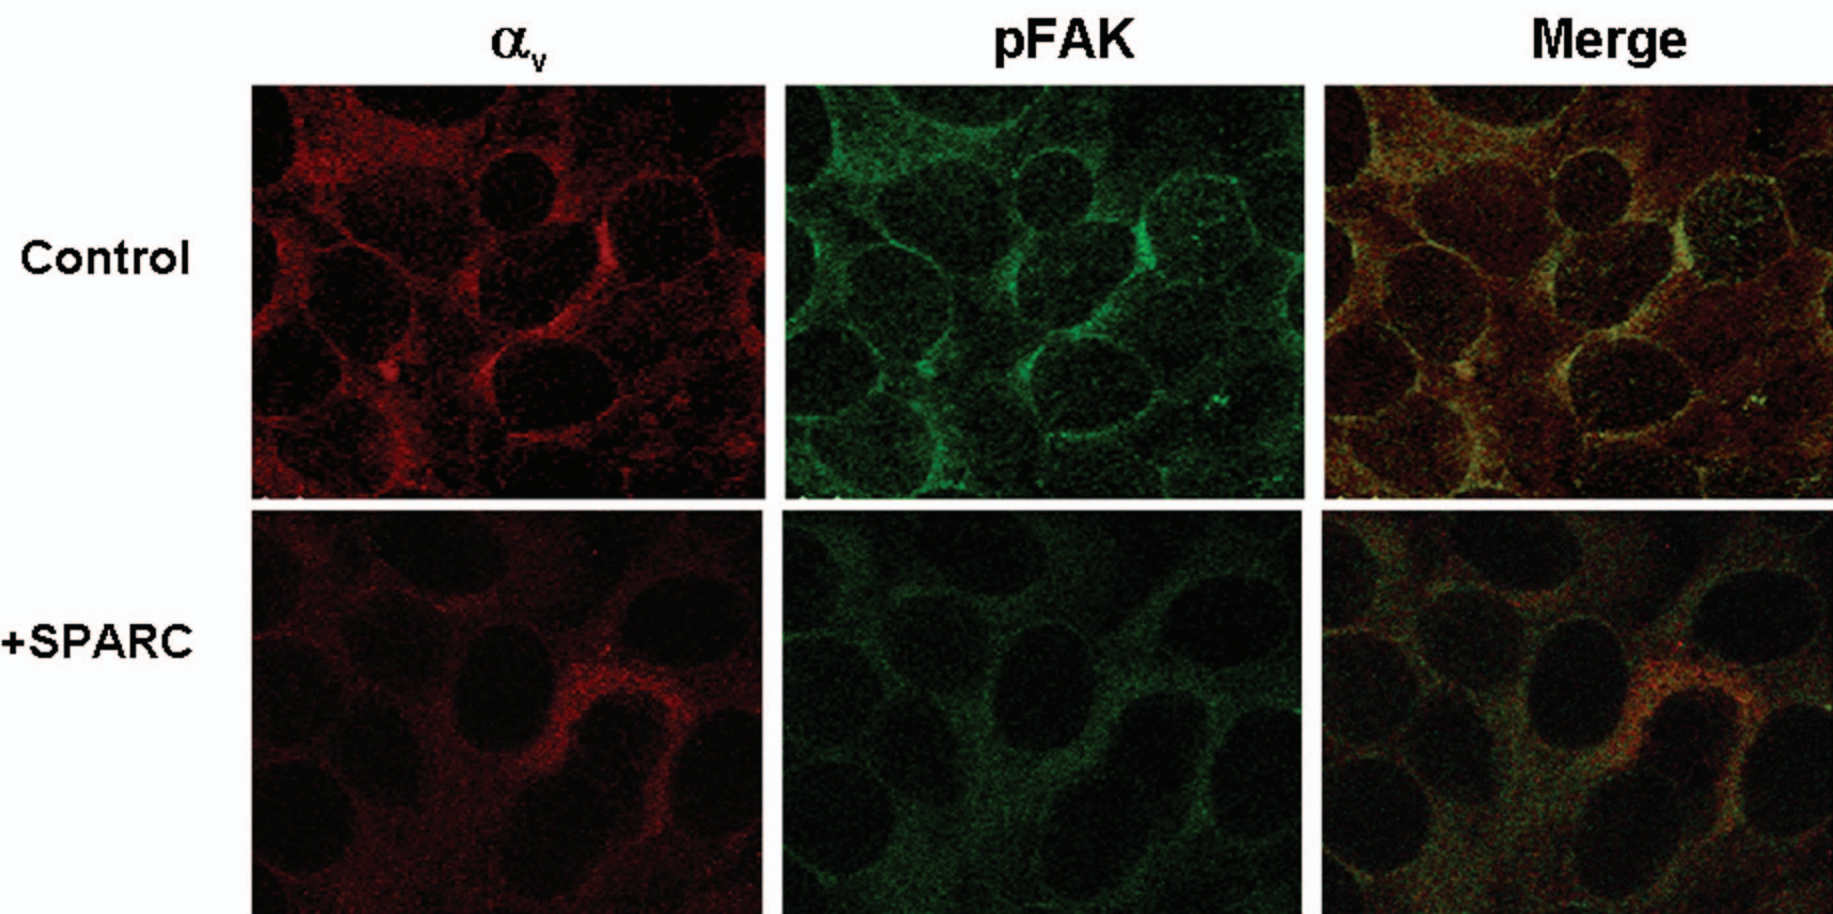

Supplement: amjpathol_170_3_1054__3.pdf [file amjpathol_170_3_1054__3.pdf]

Said et al., Supplement Figure 4:

**A**

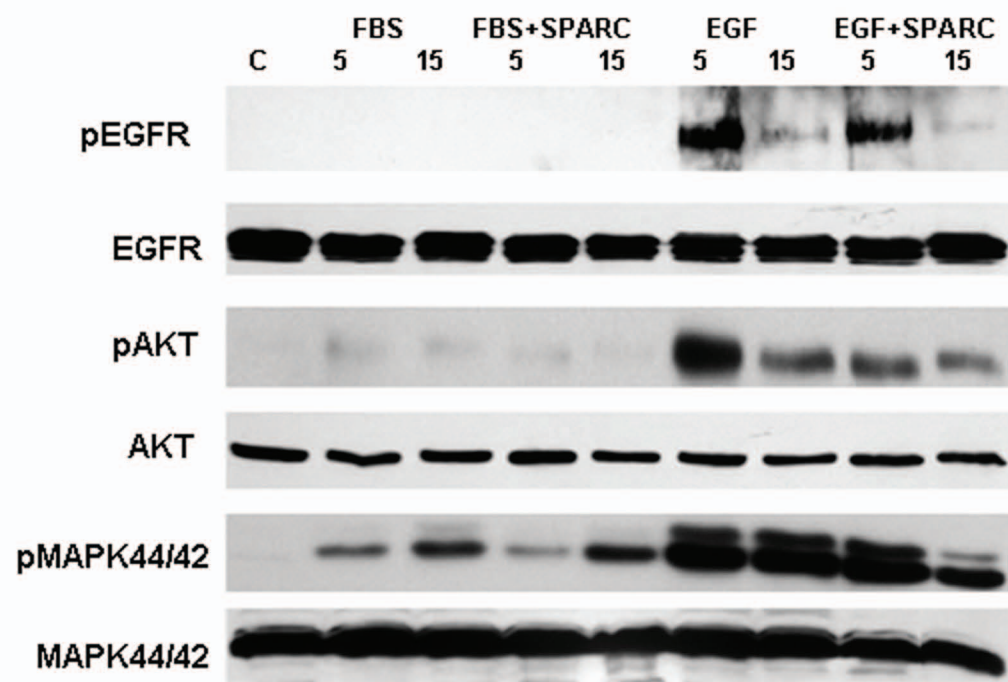

**B**

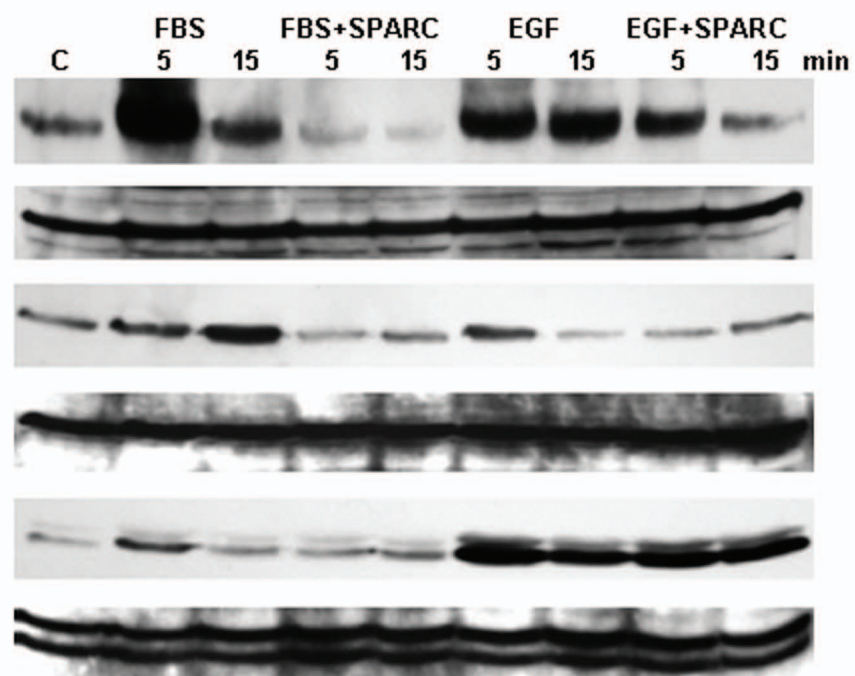

Supplement: amjpathol_170_3_1054__4.pdf [file amjpathol_170_3_1054__4.pdf]
